# Supplementary material for: JAK inhibitors improve ATP production and mitochondrial function in rheumatoid arthritis: a pilot study
Source: Springer Nature journal article supplement (doi:10.1007/s00296-023-05501-4), 2023-11-20
Supplement: MOESM1 [file 26332388]

Supplementary Figure 1

Mitochondrial respiratory curves of PBMCs in RA patients before and after therapy with JAK-inhibitors

**PBMCs in RA patients - before therapy**

**PBMCs in RA patients - after therapy with JAK-inhibitors**

Patient 1

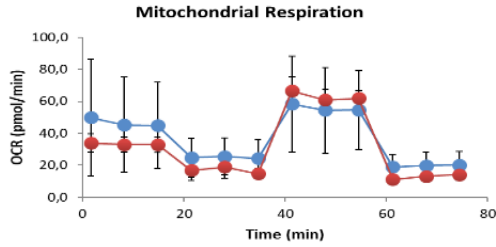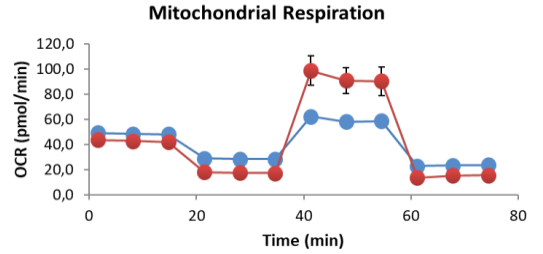

Patient 2

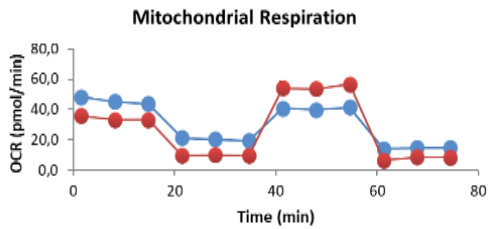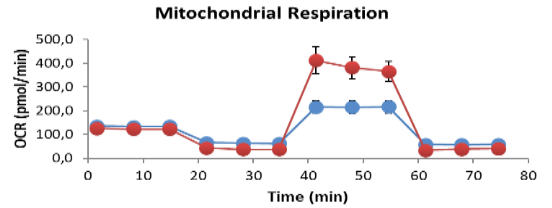

Patient 3

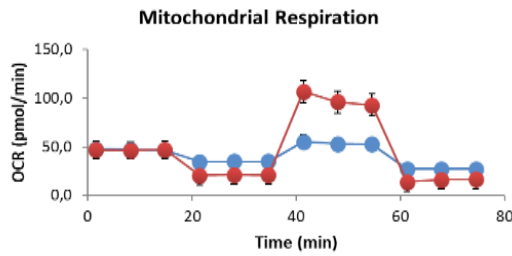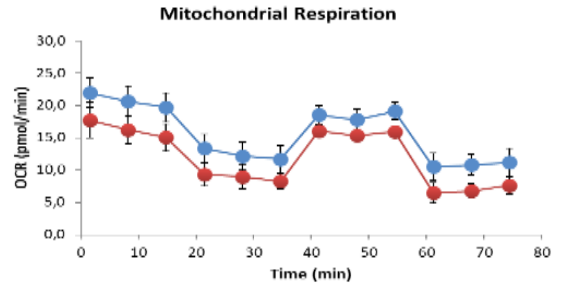

Patient 4

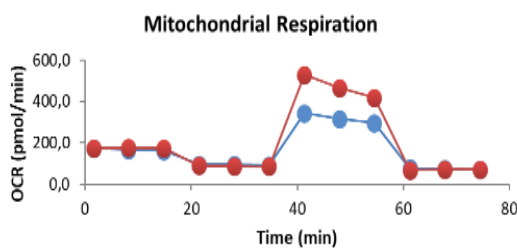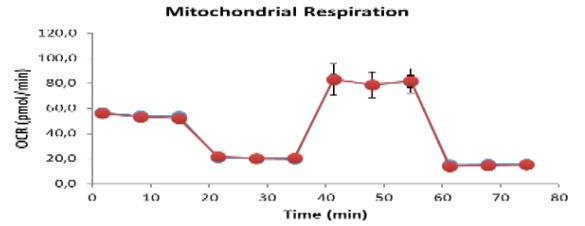

Patient 5

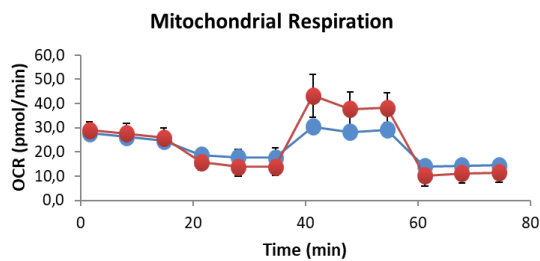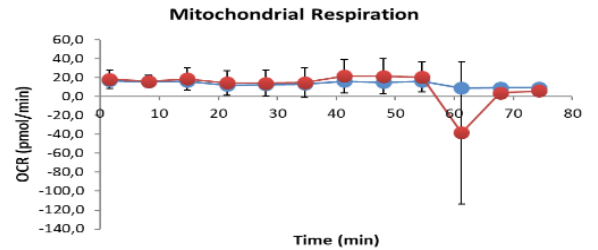

Supplementary Figure 1

Mitochondrial respiratory curves of PBMCs in RA patients before and after therapy with JAK-inhibitors

PBMCs in RA patients - before therapy

PBMCs in RA patients - after therapy with JAK-inhibitors

Patient 6

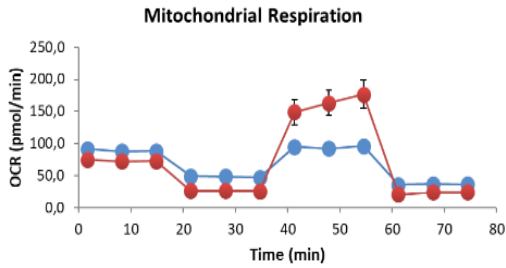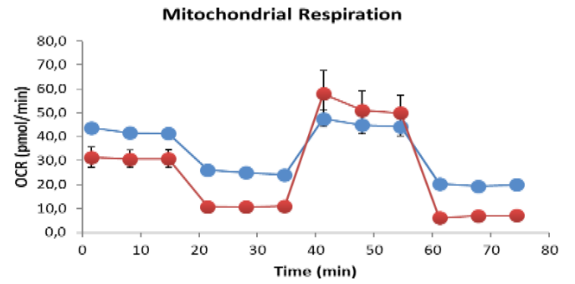

Patient 7

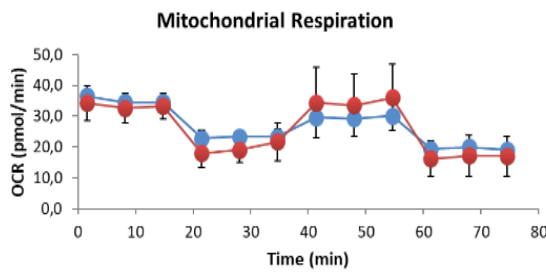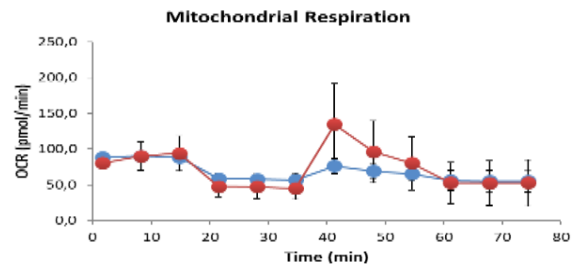

Patient 8

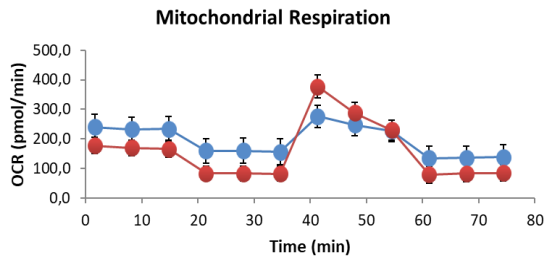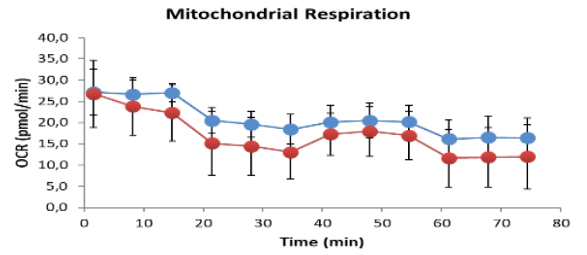

Patient 9

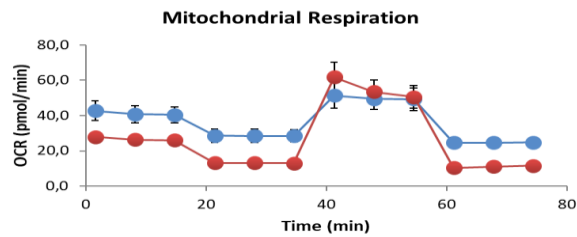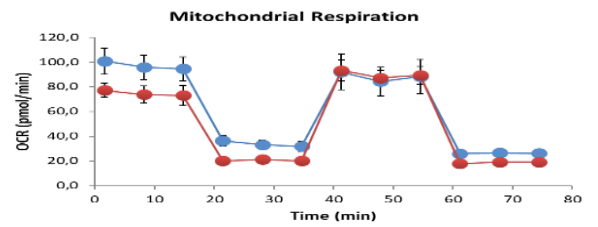

Patient 10

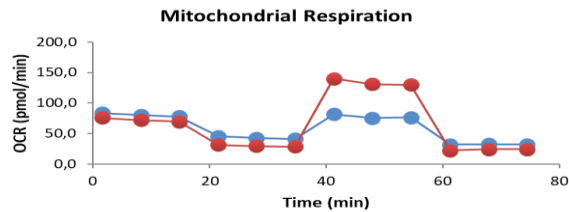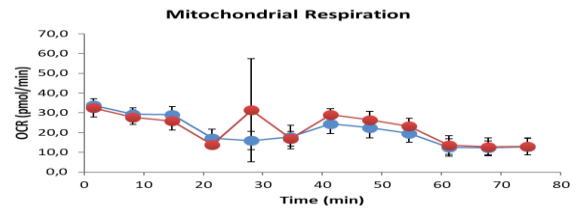

Red line – Oxygen consumption of PBMCs in RA patients

Blue line - Oxygen consumption of PBMCs in RA patients incubated with DMNQ
