# Supplementary material for: JAK inhibitors improve ATP production and mitochondrial function in rheumatoid arthritis: a pilot study
Source: Springer Nature journal article supplement (doi:10.1007/s00296-023-05501-4), 2023-11-20

## Seahorse XF Cell Mito Stress Test Profile Mitochondrial Respiration

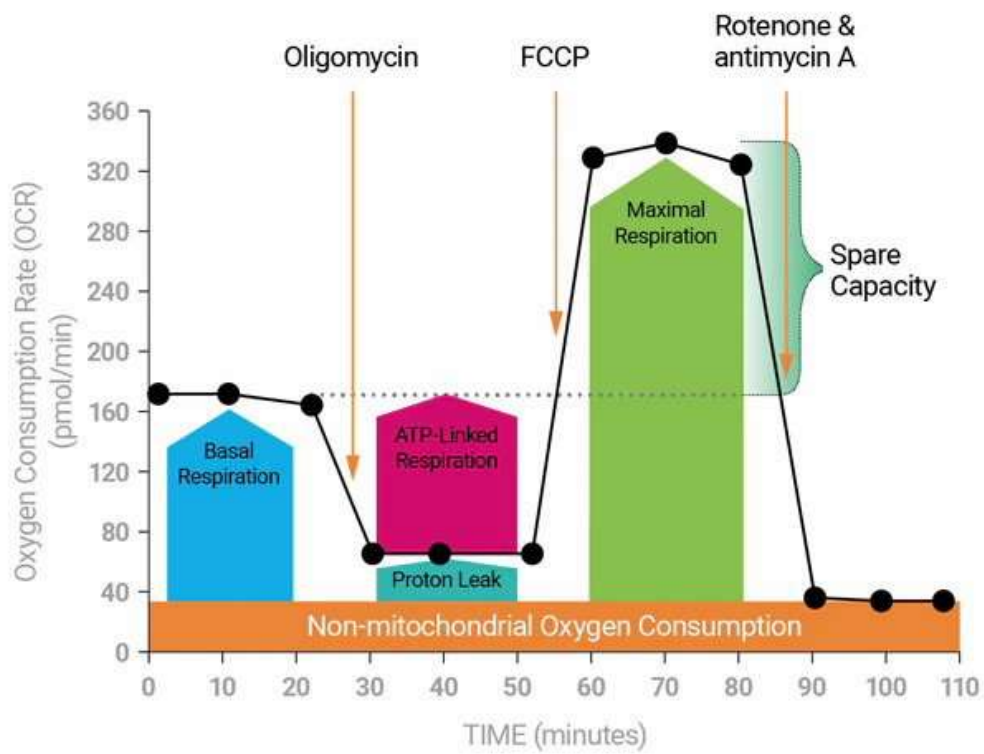

Supplement: MOESM2 [file 26332388]
