# Supplementary material for: JAK inhibitors improve ATP production and mitochondrial function in rheumatoid arthritis: a pilot study
Source: Springer Nature journal article supplement (doi:10.1007/s00296-023-05501-4), 2023-11-20
Supplement: MOESM3 [file 26332388]

Supplementary Figure 2  
Mitochondrial respiratory curves of PBMCs in healthy controls

### Mitochondrial Respiration

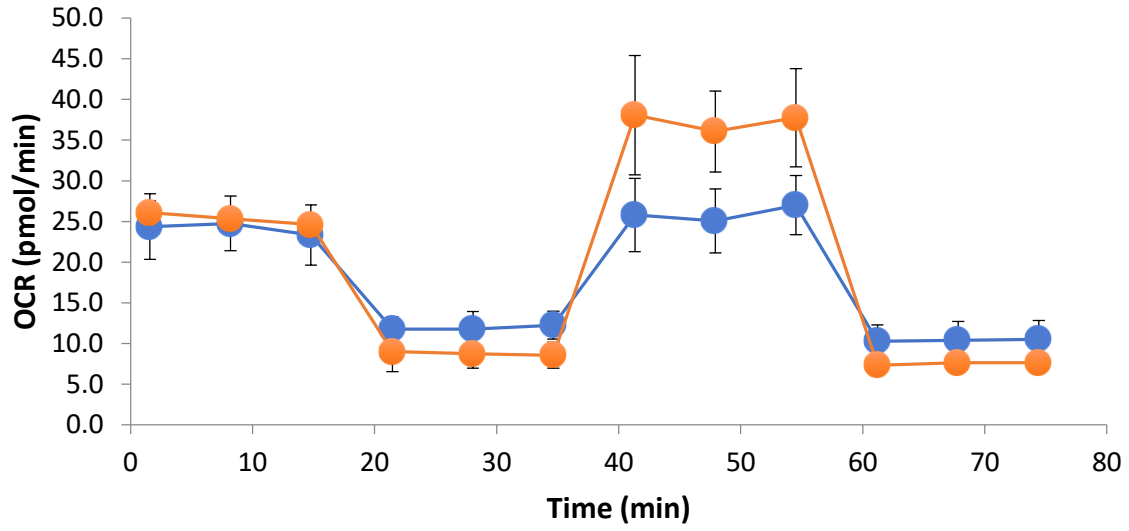

### Mitochondrial Respiration

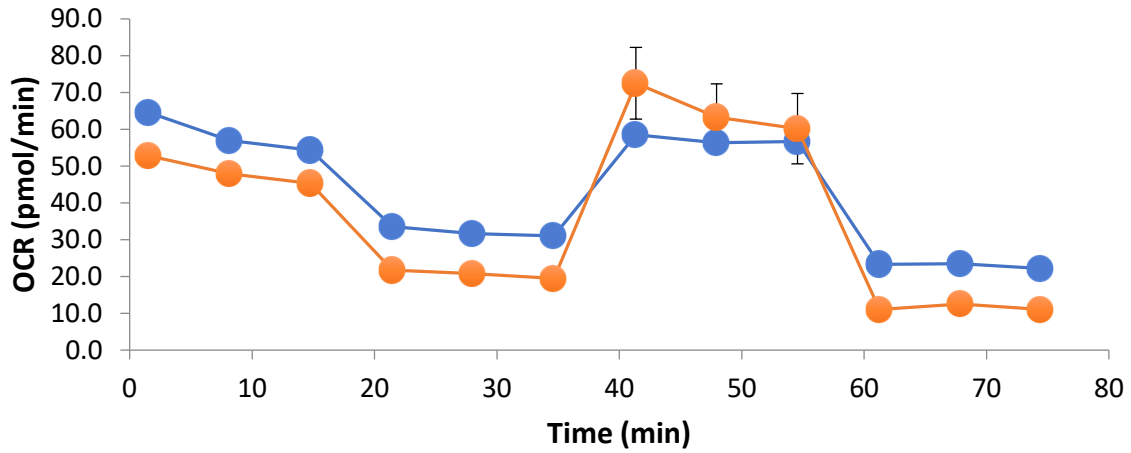

### Mitochondrial Respiration

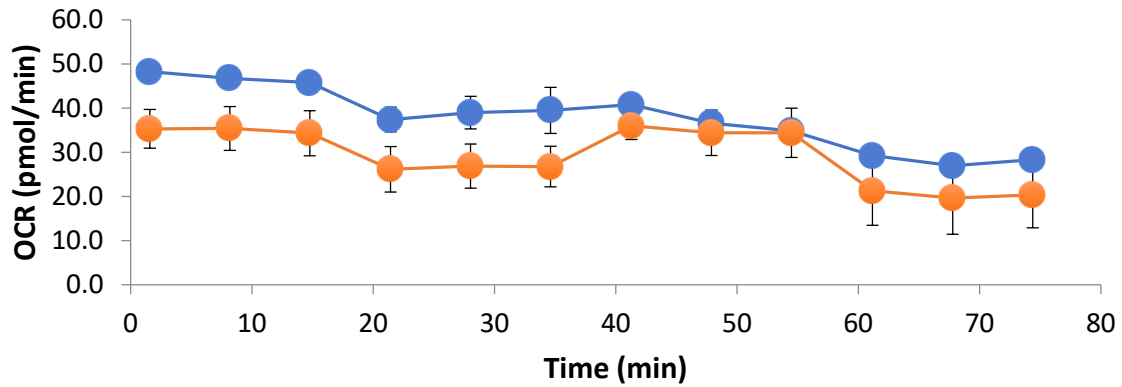

Supplementary Figure 2  
Mitochondrial respiratory curves of PBMCs in healthy controls

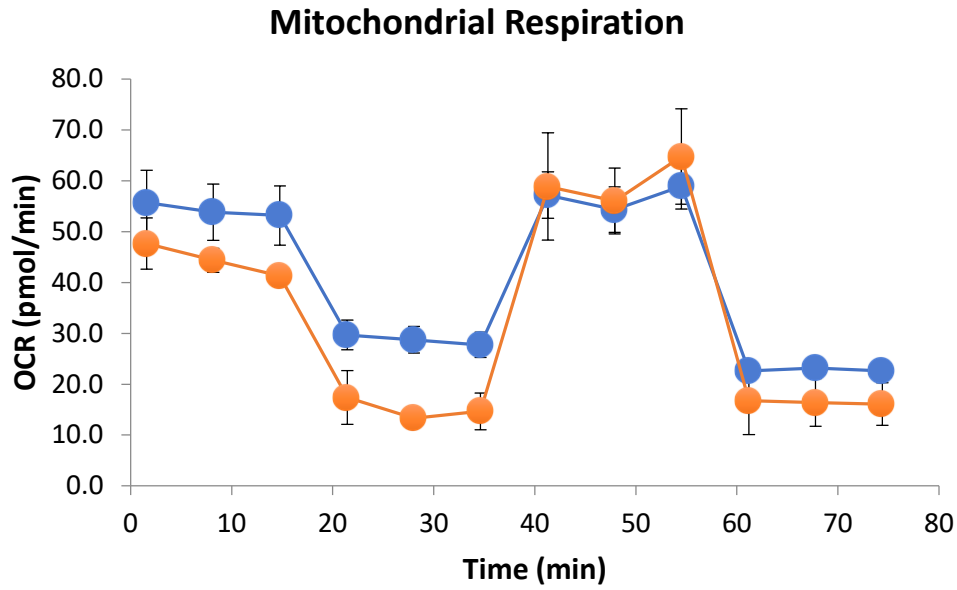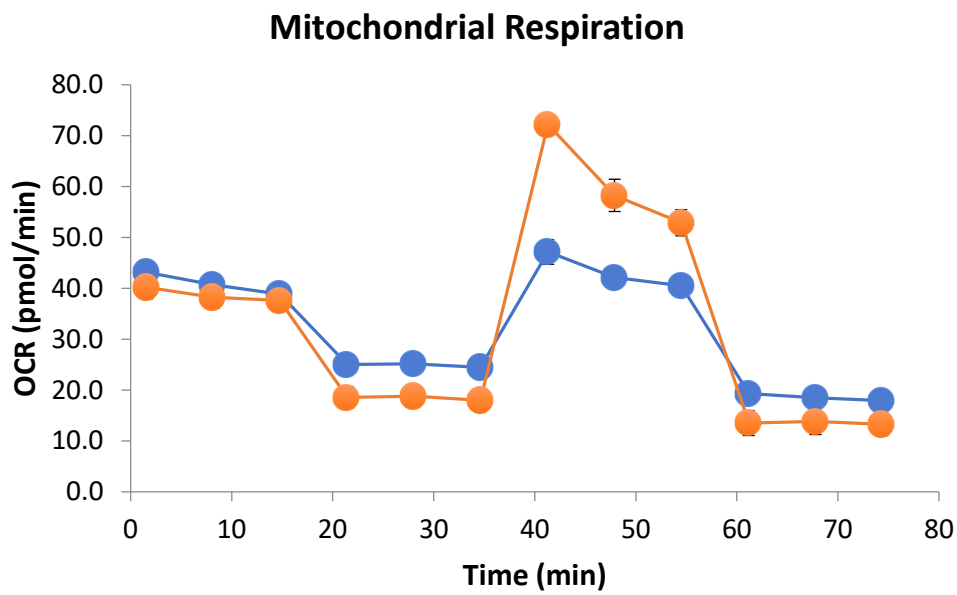

Orange line – Oxygen consumption of PBMCs in healthy controls  
Blue line - Oxygen consumption of PBMCs in healthy controls incubated with DMNQ
