# Supplementary material for: JAK inhibitors improve ATP production and mitochondrial function in rheumatoid arthritis: a pilot study
Source: Springer Nature journal article supplement (doi:10.1007/s00296-023-05501-4), 2023-11-20
Supplement: MOESM4 [file 26332388]

Supplementary Tab. 2 - Role and effect the inhibitors on mitochondrial activity

| Inhibitor                                                    | Role                                                                                    | Effect                                            |
|--------------------------------------------------------------|-----------------------------------------------------------------------------------------|---------------------------------------------------|
| Oligomycin                                                   | Inhibits ATP synthase, reduces electron flow through the electron transport chain (ETC) | Decreases ATP levels                              |
| FCCP<br>Carbonyl cyanide 4-(trifluoromethoxy)phenylhydrazone | Disrupts mitochondrial membrane potential.                                              | Increases the rate of cellular oxygen consumption |
| Rotenone                                                     | Inhibits complex III of the ETC                                                         | Suppresses mitochondrial respiration              |
